# Supplementary material
Source: Springer Nature journal article supplement (https://www.springermedizin.de/resource/supplementary/12891_2011_1295_MOESM1_ESM.pdf/9507536)
Supplement: MOESM1 [file 9507536]

Records identified through database searches  
(n = 67)

Additional articles identified in  
reference lists  
(n = 13)

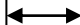

All identified articles  
(n = 80)

Duplicates  
(n = 40)

Full text articles reviewed  
(n = 40)

No MSD prevalence rates  
(n = 7)

Final group of articles for analysis  
(n = 33)
